# Supplementary material for: Radical cation scavenging activity of berberine bridge enzyme-like oligosaccharide oxidases acting on short cell wall fragments
Source: Springer Nature journal article supplement (doi:10.1038/s41598-023-31335-y), 2023-03-13
Supplement: MOESM1 [file 41598_2023_31335_MOESM1_ESM.pdf]

## SUPPLEMENTARY MATERIAL

### **RADICAL CATION SCAVENGING ACTIVITY OF BERBERINE BRIDGE ENZYME-LIKE OLIGOSACCHARIDE OXIDASES ACTING ON SHORT CELL WALL FRAGMENTS.**

Anna Scortica<sup>1,§</sup>, Valentina Scafati<sup>1,§</sup>, Moira Giovannoni<sup>1,§</sup>, Manuel Benedetti<sup>1,\*</sup>, Benedetta Mattei<sup>1</sup>

<sup>1</sup>Department of Life, Health and Environmental Sciences, University of L'Aquila, 67100 L'Aquila, Italy

\*correspondence: manuel.benedetti@univaq.it, Department of Life, Health and Environmental Sciences, University of L'Aquila, 67100 L'Aquila, Italy; phone +39 0862433272.

§, These authors equally contributed to this work.

## **TABLE OF CONTENTS**

### **Supplementary Figures (Fig. S1-S4)**

Figure S1. Heterologous expression of FHS-OGOX1 in *P. pastoris*.

Figure S2. Production of ABTS requires the activity of FHS-OGOX1 on OG4.

Figure S3. Production of ABTS and ABTS<sup>•+</sup> by the activity of FHS-OGOX1 on different OG-oligomers in the presence of HRP.

Figure S4. Production of H<sub>2</sub>O<sub>2</sub> by the activity of different OSOX/oligomer combinations in the presence of laccase.

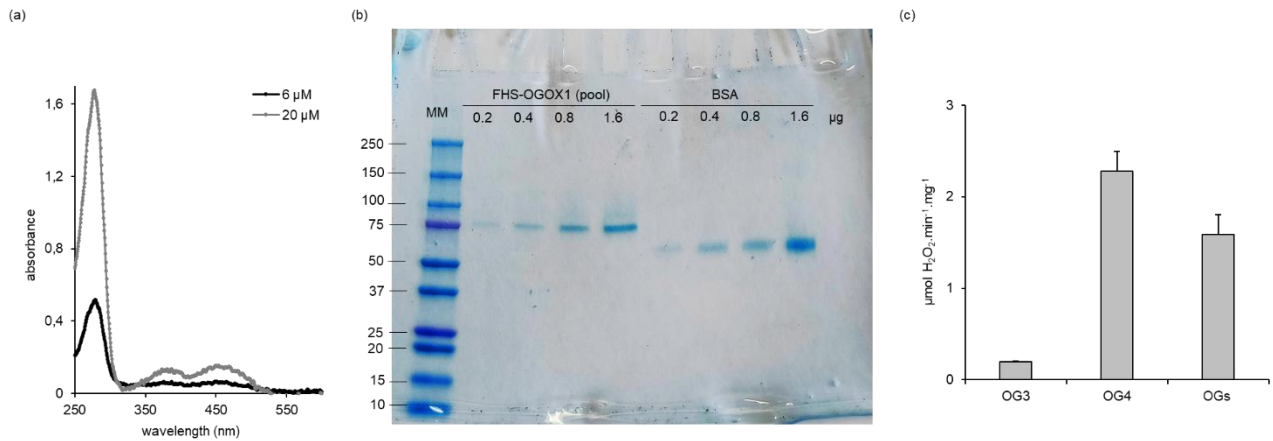

**Figure S1. Heterologous expression of FHS-OGOX1 in *P. pastoris*.** (a) UV-visible spectrum of pure FHS-OGOX1 at two different concentrations (6 μM and 20 μM) as determined by UV-absorbance. (b) SDS-PAGE/Coomassie blue staining analysis of different amounts of pure FHS-OGOX1 as determined by UV-absorbance. Same amounts of BSA were used as control. Molecular weight marker (MM) is also reported. (c) Oxidizing activity of FHS-OGOX1 (μmol H<sub>2</sub>O<sub>2</sub>.min<sup>-1</sup>.mg<sup>-1</sup>) at pH 5.0 using OG-oligomers with different length as substrates. Values are mean ± SD (N=3). [FHS-OGOX1: flag-his-sumoylated oligogalacturonide-oxidase 1, OGs: oligogalacturonides, OG4: tetra-galacturonic acid, OG3: tri-galacturonic acid].

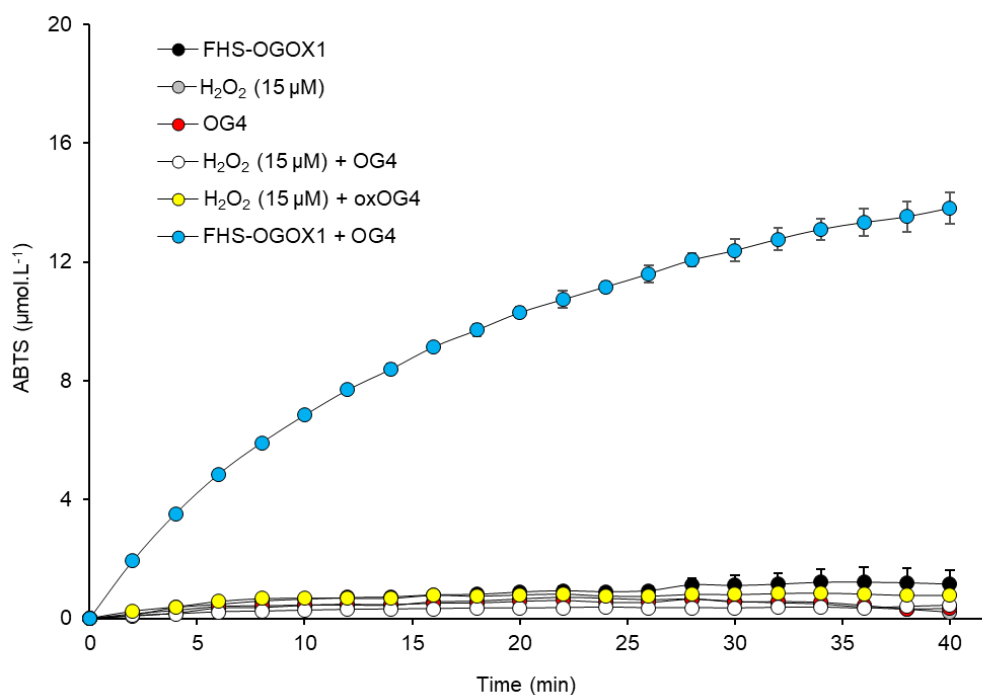

**Figure S2. Production of ABTS requires the activity of FHS-OGOX1 on OG4.** Production of ABTS (μmol.L<sup>-1</sup>) over time at pH 5.0 using different combinations of substrates and reactants. FHS-OGOX1 and OG4 were used at 4 nM and 15 μM, respectively. Values are mean ± SD (N=3). [ABTS: 2,2'-azino-bis (3-ethylbenzothiazoline-6-sulfonic acid), FHS-OGOX1: flag-his-sumoylated oligogalacturonide-oxidase 1, OG4: tetra-galacturonic acid, oxOG4: oxidized tetra-galacturonic acid].

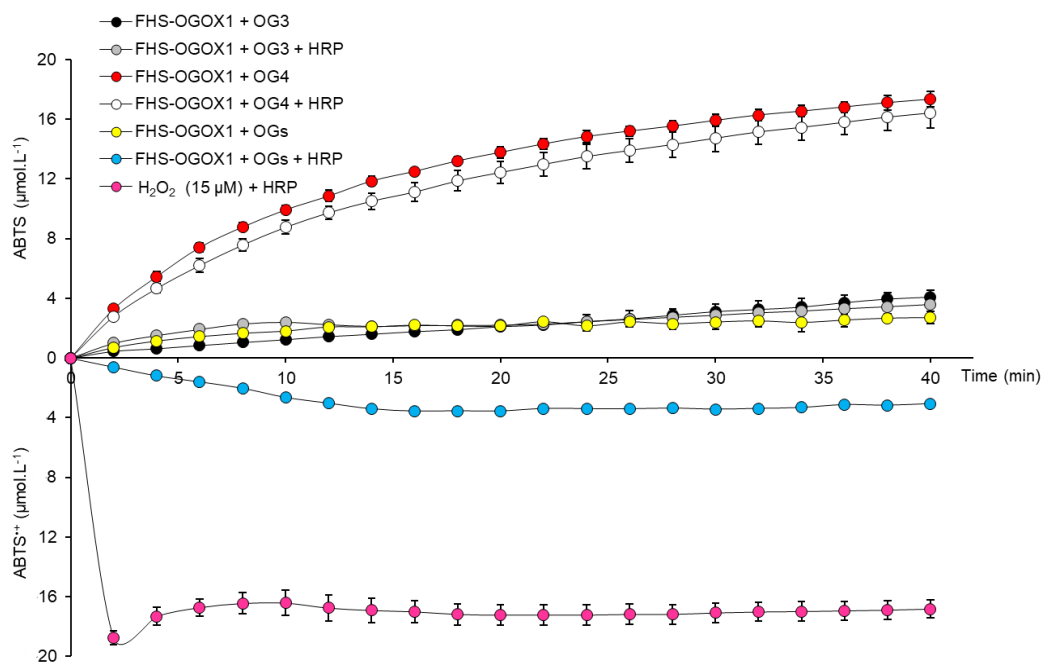

**Figure S3. Production of ABTS and ABTS<sup>•+</sup> by the activity of FHS-OGOX1 on different OG-oligomers in the presence of HRP.** Production of ABTS and ABTS<sup>•+</sup> ( $\mu\text{mol.L}^{-1}$ ) over time at pH 5.0 by the activity of FHS-OGOX1 (4 nM) and OG3 (15  $\mu\text{M}$ ), OG4 (15  $\mu\text{M}$ ) and OGs (15  $\mu\text{M}$ ) in the presence of HRP (+ HRP, 0.05  $\text{g.L}^{-1}$ ). [ $\text{H}_2\text{O}_2$  + HRP] is reported as positive control of HRP-mediated oxidation of ABTS. Values are mean  $\pm$  SD (N=3). [ABTS: 2,2'-azino-bis (3-ethylbenzothiazoline-6-sulfonic acid), FHS-OGOX1: flag-his-sumoylated oligogalacturonide-oxidase 1, HRP: horseradish peroxidase VI-type, OGs: oligogalacturonides, OG4: tetra-galacturonic acid, OG3: tri-galacturonic acid].

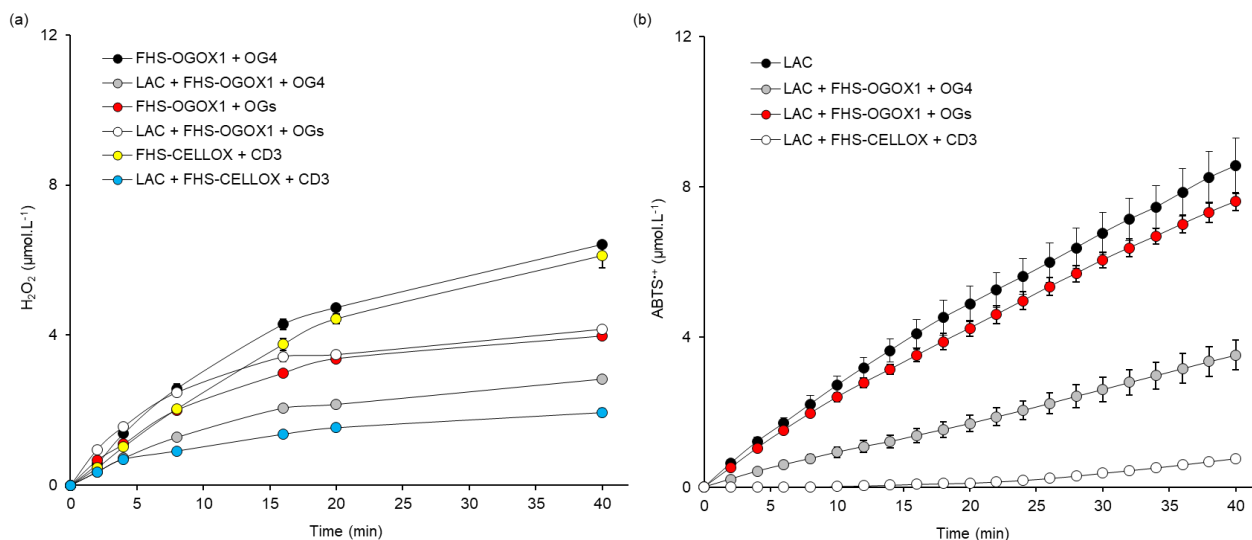

**Figure S4. Production of  $\text{H}_2\text{O}_2$  by the activity of different OSOX/oligomer combinations in the presence of laccase.** (a) Production of  $\text{H}_2\text{O}_2$  ( $\mu\text{mol.L}^{-1}$ ) over time at pH 5.0 by the activity of FHS-OGOX1/OG4, FHS-OGOX1/OGs and FHS-CELLOX/CD3 combinations in the presence of laccase ( $5 \mu\text{g.mL}^{-1}$ ) as determined by the xylenol orange assay. (b) Production of  $\text{ABTS}^{+\bullet}$  over time by laccase alone and in the presence of the same OSOX/oligomer combinations shown in (a) (extrapolated from Fig. 4). FHS-OGOX1, FHS-CELLOX and each oligomer were used at 4 nM, 16 nM and 15  $\mu\text{M}$ , respectively. Values are mean  $\pm$  SD (N=3). [ABTS: 2,2'-azino-bis (3-ethylbenzothiazoline-6-sulfonic acid), CD3: cellotriose, FHS-CELLOX: flag-his-sumoylated cellodextrin-oxidase, FHS-OGOX1: flag-his-sumoylated oligogalacturonide-oxidase 1, LAC: laccase from *T. versicolor*, OGs: oligogalacturonides, OG4: tetra-galacturonic acid].
